# Supplementary material for: Ambient Ozone Concentrations and the Risk of Perforated and Nonperforated Appendicitis: A Multicity Case-Crossover Study
Source: PubMed Central journal article supplement (PMC3734492; doi:10.1289/ehp.1206085), 2013-07-11
Supplement: ehp.1206085.s001.pdf [file ehp.1206085.s001.pdf]

**Supplemental Material**  
**Ambient Ozone Concentrations and the Risk of Perforated and  
Nonperforated Appendicitis: A Multicity Case-Crossover Study**

Gilaad G Kaplan, Divine Tanyingoh, Elijah Dixon, Markey Johnson, Amanda J. Wheeler, Robert P. Myers, Stefania Bertazzon, Vineet Saini, Karen Madsen, Subrata Ghosh, and Paul J Villeneuve

**Table of Contents**

Page 2 – Supplemental Material, Table S1.

Page 3 - Supplemental Material, Table S2.

**Supplemental Material, Table S1.** P-values for heterogeneity between 12 cities for the main models.

| <b>Models</b>          | <b>Same-Day<br/>P-Value<br/>Heterogeneity</b> | <b>1-Day Lag<br/>P-Value<br/>Heterogeneity</b> | <b>3-Day Average<br/>P-Value<br/>Heterogeneity</b> | <b>5-Day Average<br/>P-Value<br/>Heterogeneity</b> | <b>7-Day Average<br/>P-Value<br/>Heterogeneity</b> |
|------------------------|-----------------------------------------------|------------------------------------------------|----------------------------------------------------|----------------------------------------------------|----------------------------------------------------|
| All Appendicitis       | 0.15                                          | 0.49                                           | 0.46                                               | 0.31                                               | 0.89                                               |
| Appendicitis Phenotype |                                               |                                                |                                                    |                                                    |                                                    |
| Nonperforated          | 0.16                                          | 0.37                                           | 0.15                                               | 0.08                                               | 0.35                                               |
| Perforated             | 0.58                                          | 0.33                                           | 0.14                                               | 0.23                                               | 0.27                                               |

**Supplemental Material, Table S2.** Odds ratios (95% CI) based on alternative models of the association between ozone exposures and appendicitis adjusted for temperature and humidity in 12 cities of Canada (2004 – 2008).

| Model                                                                                       | Same-Day          | 1-Day Lag         | 3-Day Average     | Cumulative Exposure |                   |
|---------------------------------------------------------------------------------------------|-------------------|-------------------|-------------------|---------------------|-------------------|
|                                                                                             |                   |                   |                   | 5-Day Average       | 7-Day Average     |
| Maximum ozone, temperature and humidity on day of admission <sup>a</sup>                    |                   |                   |                   |                     |                   |
| All Appendicitis                                                                            | 1.00 (0.96, 1.04) | 1.03 (1.00, 1.11) | 1.03 (0.99, 1.08) | 1.04 (0.99, 1.10)   | 1.07 (1.02, 1.13) |
| Appendicitis Phenotype                                                                      |                   |                   |                   |                     |                   |
| Nonperforated                                                                               | 1.00 (0.95, 1.06) | 1.01 (0.97, 1.05) | 1.00 (0.94, 1.06) | 0.99 (0.92, 1.07)   | 1.02 (0.95, 1.09) |
| Perforated                                                                                  | 0.98 (0.93, 1.04) | 1.07 (1.01, 1.14) | 1.11 (1.01, 1.23) | 1.15 (1.04, 1.27)   | 1.22 (1.09, 1.36) |
| Maximum ozone, temperature and humidity during the same period as ozone <sup>a</sup>        |                   |                   |                   |                     |                   |
| All Appendicitis                                                                            | 1.00 (0.96, 1.04) | 1.02 (0.99, 1.05) | 1.03 (0.99, 1.07) | 1.03 (0.97, 1.09)   | 1.06 (1.00, 1.12) |
| Appendicitis Phenotype                                                                      |                   |                   |                   |                     |                   |
| Nonperforated                                                                               | 1.00 (0.96, 1.06) | 1.00 (0.96, 1.04) | 1.00 (0.94, 1.07) | 0.99 (0.91, 1.07)   | 1.01 (0.94, 1.08) |
| Perforated                                                                                  | 0.98 (0.93, 1.04) | 1.07 (1.00, 1.14) | 1.10 (0.99, 1.21) | 1.13 (1.02, 1.27)   | 1.19 (1.06, 1.35) |
| 24-hour mean ozone, temperature and humidity on day of admission <sup>a</sup>               |                   |                   |                   |                     |                   |
| All Appendicitis                                                                            | 1.00 (0.97, 1.04) | 1.02 (1.00, 1.05) | 1.03 (0.99, 1.07) | 1.03 (0.99, 1.08)   | 1.06 (1.02, 1.11) |
| Appendicitis Phenotype                                                                      |                   |                   |                   |                     |                   |
| Nonperforated                                                                               | 1.00 (0.96, 1.05) | 1.01 (0.97, 1.04) | 1.00 (0.95, 1.05) | 0.99 (0.93, 1.06)   | 1.02 (0.96, 1.08) |
| Perforated                                                                                  | 0.98 (0.94, 1.03) | 1.06 (1.01, 1.12) | 1.10 (1.01, 1.19) | 1.12 (1.03, 1.23)   | 1.18 (1.07, 1.30) |
| 10 ppb increase in maximum ozone, temperature and humidity on day of admission <sup>b</sup> |                   |                   |                   |                     |                   |
| All Appendicitis                                                                            | 1.00 (0.98, 1.03) | 1.02 (1.00, 1.03) | 1.02 (0.99, 1.05) | 1.02 (0.99, 1.06)   | 1.05 (1.01, 1.08) |
| Appendicitis Phenotype                                                                      |                   |                   |                   |                     |                   |
| Nonperforated                                                                               | 1.00 (0.97, 1.03) | 1.00 (0.98, 1.03) | 1.00 (0.96, 1.04) | 1.00 (0.95, 1.04)   | 1.01 (0.97, 1.06) |
| Perforated                                                                                  | 0.99 (0.95, 1.02) | 1.04 (1.01, 1.08) | 1.07 (1.01, 1.14) | 1.09 (1.02, 1.16)   | 1.13 (1.05, 1.21) |

<sup>a</sup>Conditional logistic regression model of the odds of appendicitis in association with a 16 ppb increase in the daily maximum ozone concentration or 24-hour mean ozone adjusted for mean temperature and relative humidity as indicated.

<sup>b</sup>Conditional logistic regression model of the odds of appendicitis in association with a 10 ppb increase in the daily maximum ozone concentration adjusted for mean temperature and relative humidity on day of admission.
